# Supplementary material for: Morphological and Surface Potential Characterization of Protein Nanobiofilm Formation on Magnesium Alloy Oxide: Their Role in Biodegradation
Source: PubMed Central journal article supplement (PMC9454254; doi:10.1021/acs.langmuir.2c01540), 2022-08-22
Supplement: la2c01540_si_001.pdf [file la2c01540_si_001.pdf]

## Supporting information

### **Morphological and surface potential characterization of protein nano-biofilm formation on magnesium alloy oxide: Their role in biodegradation**

Ehsan Rahimi<sup>a,b\*</sup> Amin Imani<sup>c\*</sup>, Maria Lekka<sup>d</sup>, Francesco Andreatta<sup>a</sup>, Yaiza Gonzalez-Garcia<sup>b</sup>,  
Johannes M. C. Mol<sup>b</sup>, Edouard Asselin<sup>c</sup>, Lorenzo Fedrizzi<sup>a</sup>

<sup>a</sup>Polytechnic Department of Engineering and Architecture, University of Udine, 33100 Udine, Italy

<sup>b</sup>Delft University of Technology, Department of Materials Science and Engineering, Mekelweg 2,  
2628 CD Delft, The Netherlands

<sup>c</sup>Department of Materials Engineering, The University of British Columbia, Vancouver, BC, V6T 1Z4,  
Canada

<sup>d</sup>CIDETEC, Basque Research and Technology Alliance (BRTA), 20014 Donostia, San Sebastián,  
Spain

\* Corresponding authors:

E.Rahimi: [e.rahimi-2@tudelft.nl](mailto:e.rahimi-2@tudelft.nl)

A.Imani: [amin.imani@ubc.ca](mailto:amin.imani@ubc.ca)

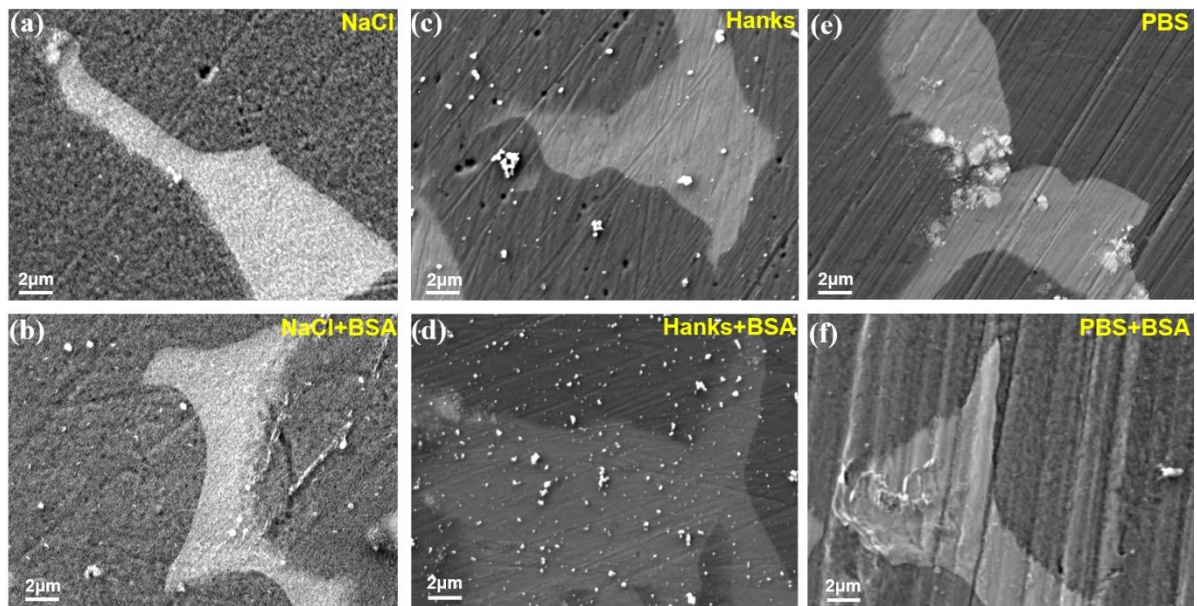

**Figure S1.** SEM images of WE 43 Mg-based alloy after 10 minutes immersion in (a) 0.9% NaCl and (b) 0.9% NaCl +4g/L BSA, (c) Hanks and (d) Hanks+4g/L BSA, (e) PBS and (f) PBS+4g/L BSA physiological solutions at 37C° and pH 7.4.
